## GLP-1 is an independent predictor of long-term mortality in patients with myocardial infarction complicated by cardiogenic shock – a substudy of the IABP-SHOCK II trial

G. Fuernau<sup>1</sup>, M. Lehrke<sup>2</sup>, C. Jung<sup>3</sup>, F. Kahles<sup>2</sup>, C. Leberh<sup>2</sup>, I. Eitel<sup>1</sup>, N. Thelemann<sup>1</sup>, S. Desch<sup>4</sup>, K. Werdan<sup>5</sup>, U. Zeymer<sup>6</sup>, V. Adams<sup>7</sup>, N. Marx<sup>2</sup>, H. Thiele<sup>4</sup>

<sup>1</sup>University Heart Center, Luebeck, Germany; <sup>2</sup>RWTH University Hospital Aachen, Department of Internal Medicine I, Aachen, Germany; <sup>3</sup>University Hospital Duesseldorf, Duesseldorf, Germany; <sup>4</sup>University of Leipzig, Heart Center, Leipzig, Germany; <sup>5</sup>University Clinic Halle (Saale), Halle, Germany; <sup>6</sup>Klinikum Ludwigshafen, Ludwigshafen, Germany; <sup>7</sup>Heart Center - University Hospital Dresden, Dresden, Germany

**Funding Acknowledgement:** Type of funding source: Public grant(s) – National budget only. Main funding source(s): German Research Foundation (DFG), German Heart Research Foundation

**Background:** The incretin hormone Glucagon-like-peptide 1 (GLP-1) is a major stimulus for glucose dependent insulin secretion and holds cardio-protective efficacy. This has made the GLP-1 system a preferred target for diabetes therapy. Secretion of GLP-1 happens in response to nutritional but also inflammatory stimuli. Consequently, marked elevation of circulating GLP-1 levels were found in critically ill patients featuring marked association to markers of inflammation.

**Purpose:** Our study sought to investigate GLP-1 levels in patients with cardiogenic shock (CS) complicating myocardial infarction and a possible prognostic correlation to short- and long-term outcome.

**Methods:** We serially assessed circulating GLP-1 levels in a prospectively planned biomarker substudy in the IABP-SHOCK II trial. Blood samples were drawn during index PCI and at day 2. The blood was centrifuged immediately, and serum was frozen at  $-87^{\circ}\text{C}$ . GLP-1 was measured with a standard ELISA-kit. All-cause mortality at short- (30 days), intermediate- (1 year) and long-term (6 years) follow-up was used for outcome assessment.

**Results:** In this study we found circulating GLP-1 to be markedly elevated in patients with myocardial infarction complicated by CS ( $n=172$ ) at time of index PCI. Patients with fatal short-term outcome ( $n=70$ ) exhibited higher GLP-1 levels (86 [45–130] pM) at ICU admission in comparison to pa-

tients with 30-day survival (48 [33–78] pM;  $p<0.001$ ) ( $n=102$ ). In repeated measures ANOVA the course of GLP-1 levels between baseline and day 2 showed a significant interaction between survivors and non-survivors ( $p=0.04$ ). By univariate Cox-regression analysis GLP-1 levels  $>$ median were predictive of short- (hazard ratio [HR] 2.43; 95% confidence interval [CI] 1.50–3.94;  $p<0.001$ ), intermediate- (HR 2.46; 95% CI 1.62–3.76;  $p<0.001$ ) and long-term (HR 2.12; 95% CI 1.44–3.11;  $p<0.001$ ) outcome. This association remained after multivariable correction (HR 2.01; 95% CI 1.37–3.07;  $p<0.001$ ). In a landmark analysis we found a significant higher mortality in patients with GLP-1 levels  $>$ median from day 30 to 1 year (HR 2.56; 95% CI 1.08–6.09;  $p=0.03$ ). In contrast, beyond 1 year up to 6 years no difference has been observed anymore (HR 1.02; 95% CI 0.41–2.58;  $p=0.96$ ).

**Conclusions:** Elevated plasma levels of GLP-1 are an independent predictor for impaired prognosis in patients with myocardial infarction complicated by CS at short-, intermediate and long-term follow-up. In a landmark analysis this prognostic effect is sustained up to 1 year. The functional relevance of GLP-1 in this context is currently unknown and needs further investigations.
